# Supplementary material
Source: publisher figshare collection journal article supplement (https://gsapubs.figshare.com/ndownloader/files/22410372)
Supplement: Supplementary file 1 [file 22410372]

Supplement 5. Figure AR-12 South Pandora trough - Back-arc basin spreading ridge.

Bathymetry, gravity and magnetic anomaly maps of the active spreading segments of the South Pandora trough, North Fiji Basin.

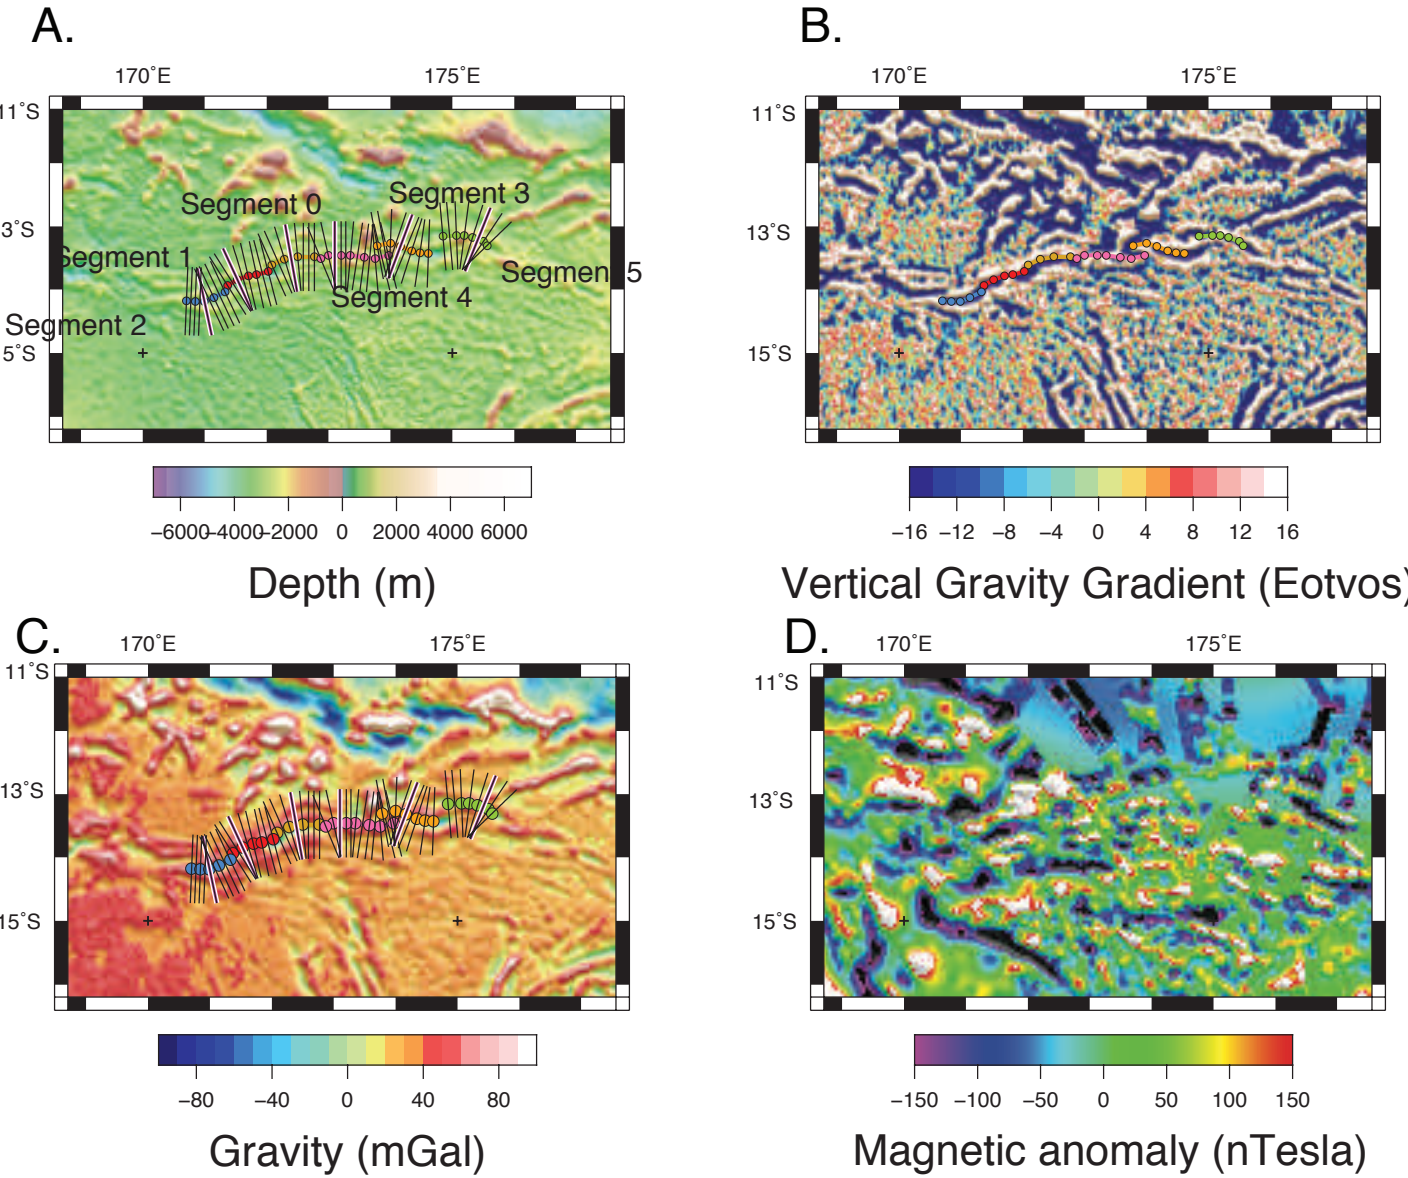

- Legend
- Profiles used to find median axial anomaly
  - Representative profile (for each bathymetry and gravity segment)
