# Supplementary material
Source: publisher figshare collection journal article supplement (https://gsapubs.figshare.com/ndownloader/files/22410372)
Supplement: Supplementary file 2 [file 22410372]

# Supplement 5. Figure AR-3 South East Indian ridge - Large-scale mid-ocean ridge.

Bathymetry, gravity and magnetic anomaly maps of the active spreading segments of the South East Indian ridge.

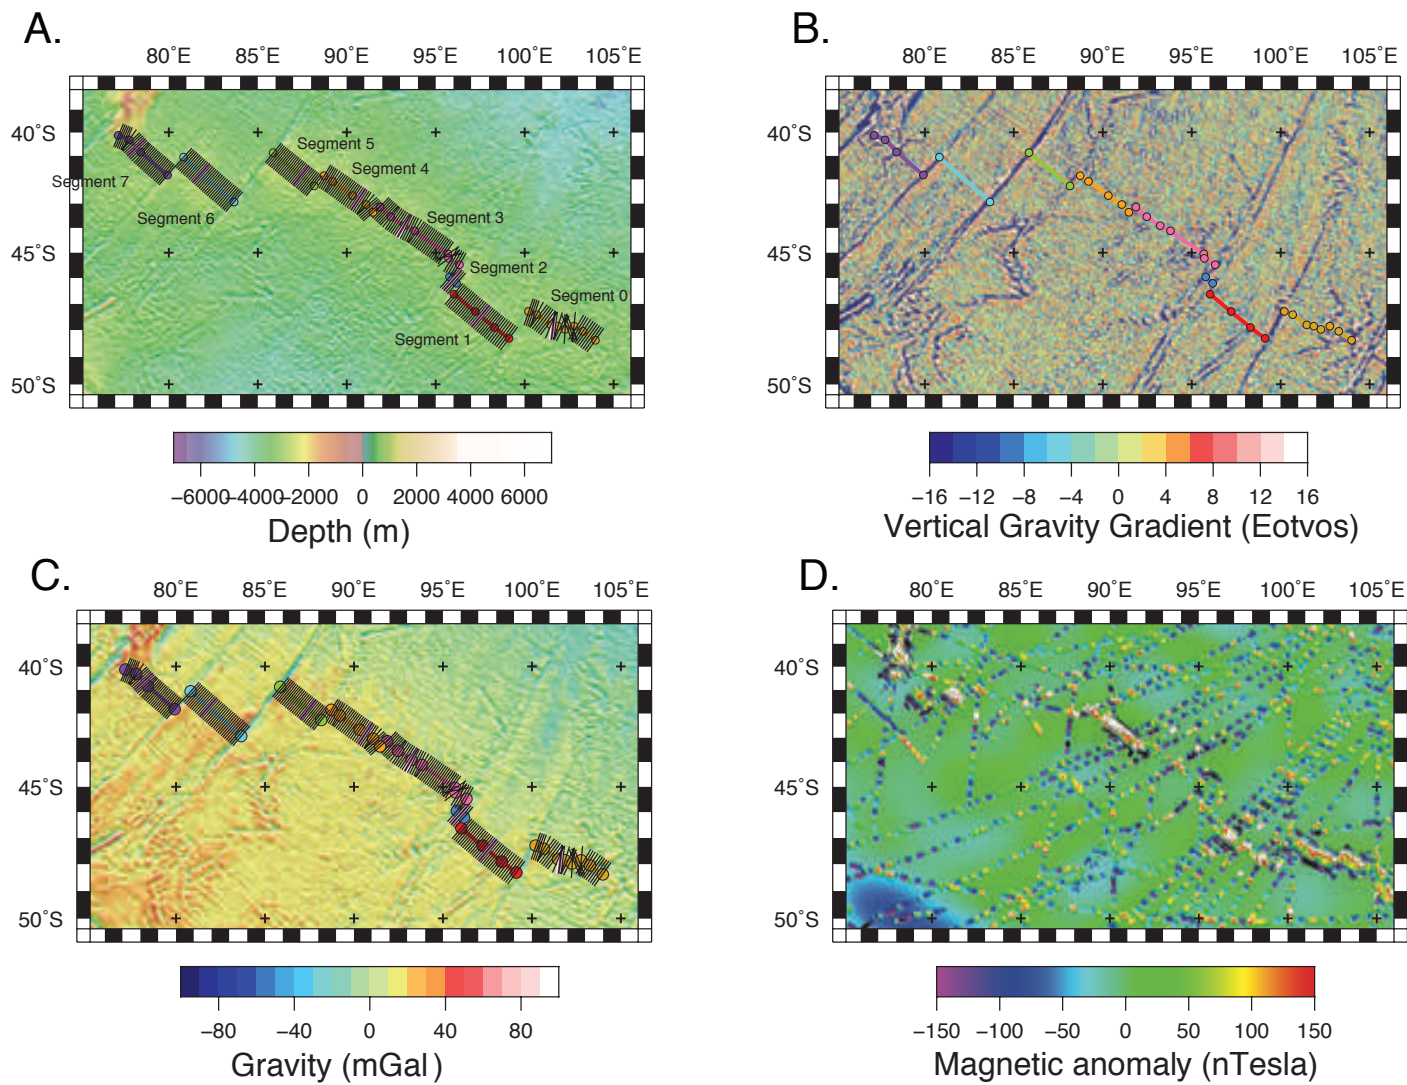

## Legend

- Profiles used to find median axial anomaly
- Representative profile (for each bathymetry and gravity segment)
