# Supplementary material
Source: publisher figshare collection journal article supplement (https://gsapubs.figshare.com/ndownloader/files/22410372)
Supplement: Supplementary file 11 [file 22410372]

Supplement 5. Figure AR-8 Easter - Microplate spreading ridges.

Bathymetry, gravity and magnetic anomaly maps of the active spreading segments of the Easter microplate spreading ridges.

A.

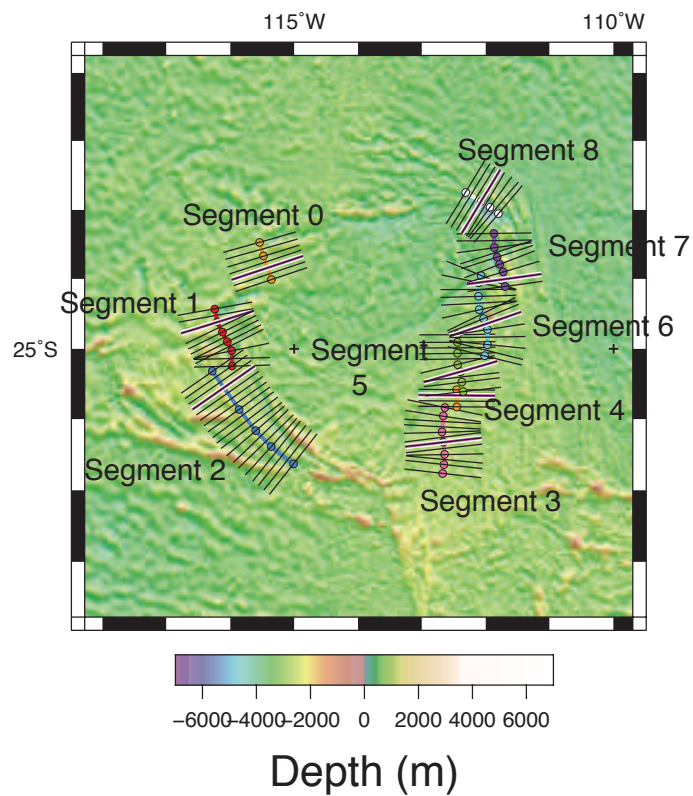

B.

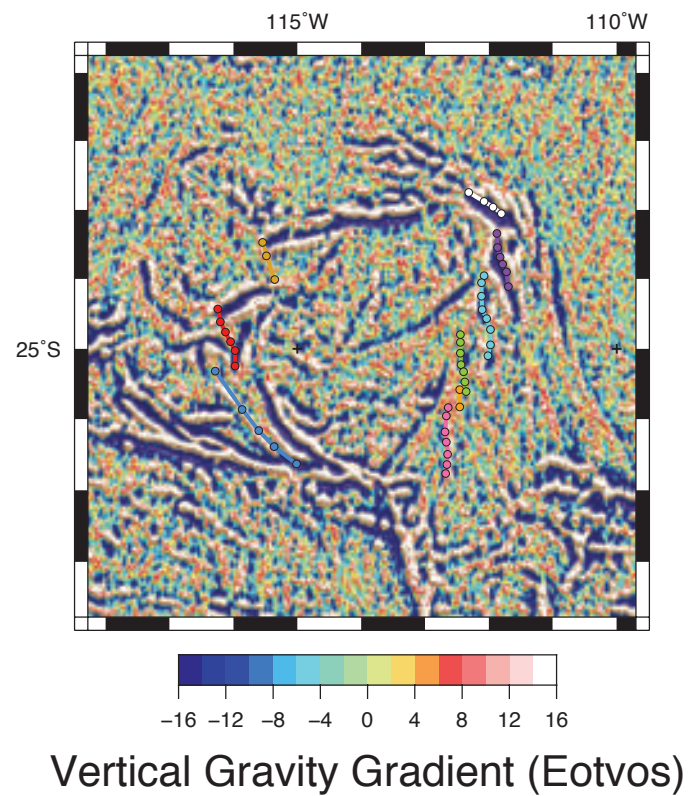

C.

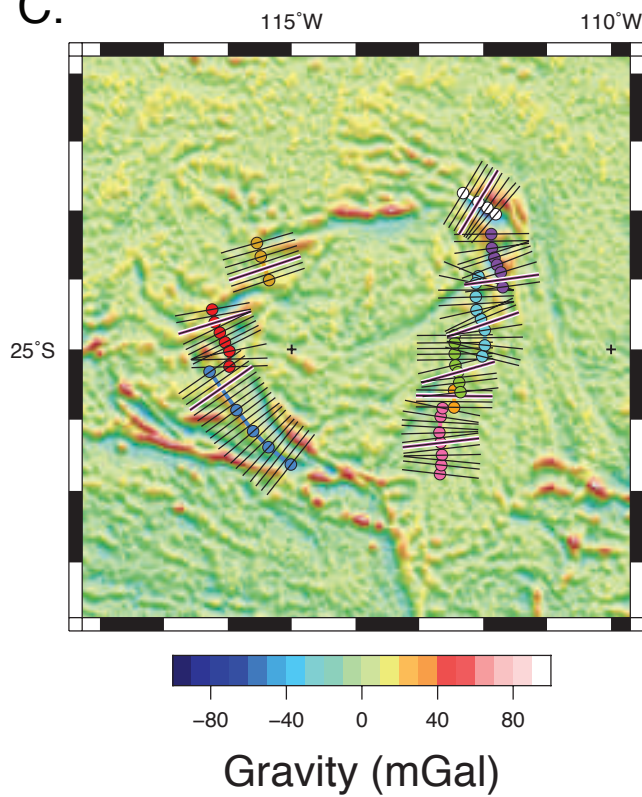

D.

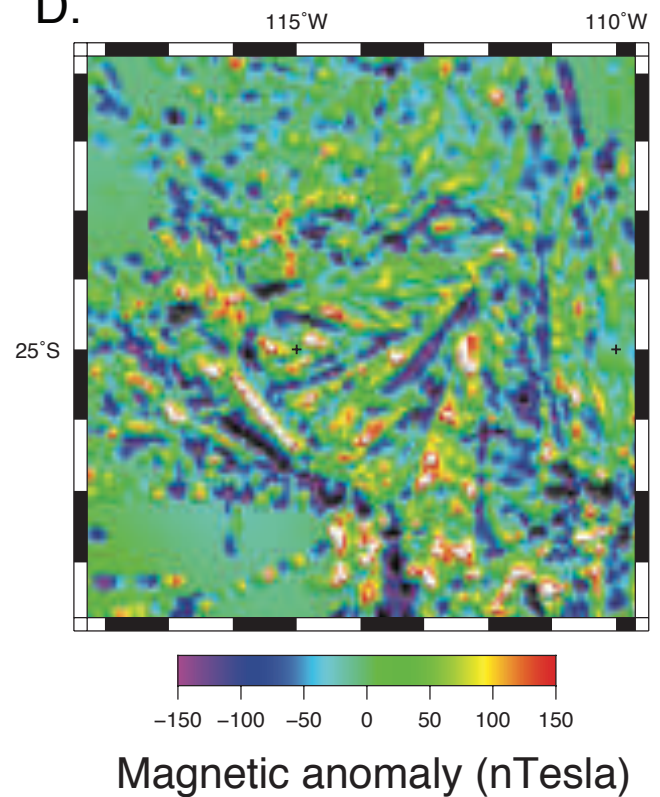

Legend

- Profiles used to find median axial anomaly
- Representative profile (for each bathymetry and gravity segment)
