# Supplementary material
Source: publisher figshare collection journal article supplement (https://gsapubs.figshare.com/ndownloader/files/22410372)

Supplement 5. Figure AR-13 North Fiji Basin - West Fiji Ridge - Active back-arc basin spreading ridge.

Bathymetry, gravity and magnetic anomaly maps of the active spreading segments of the West Fiji Ridge, North Fiji Basin.

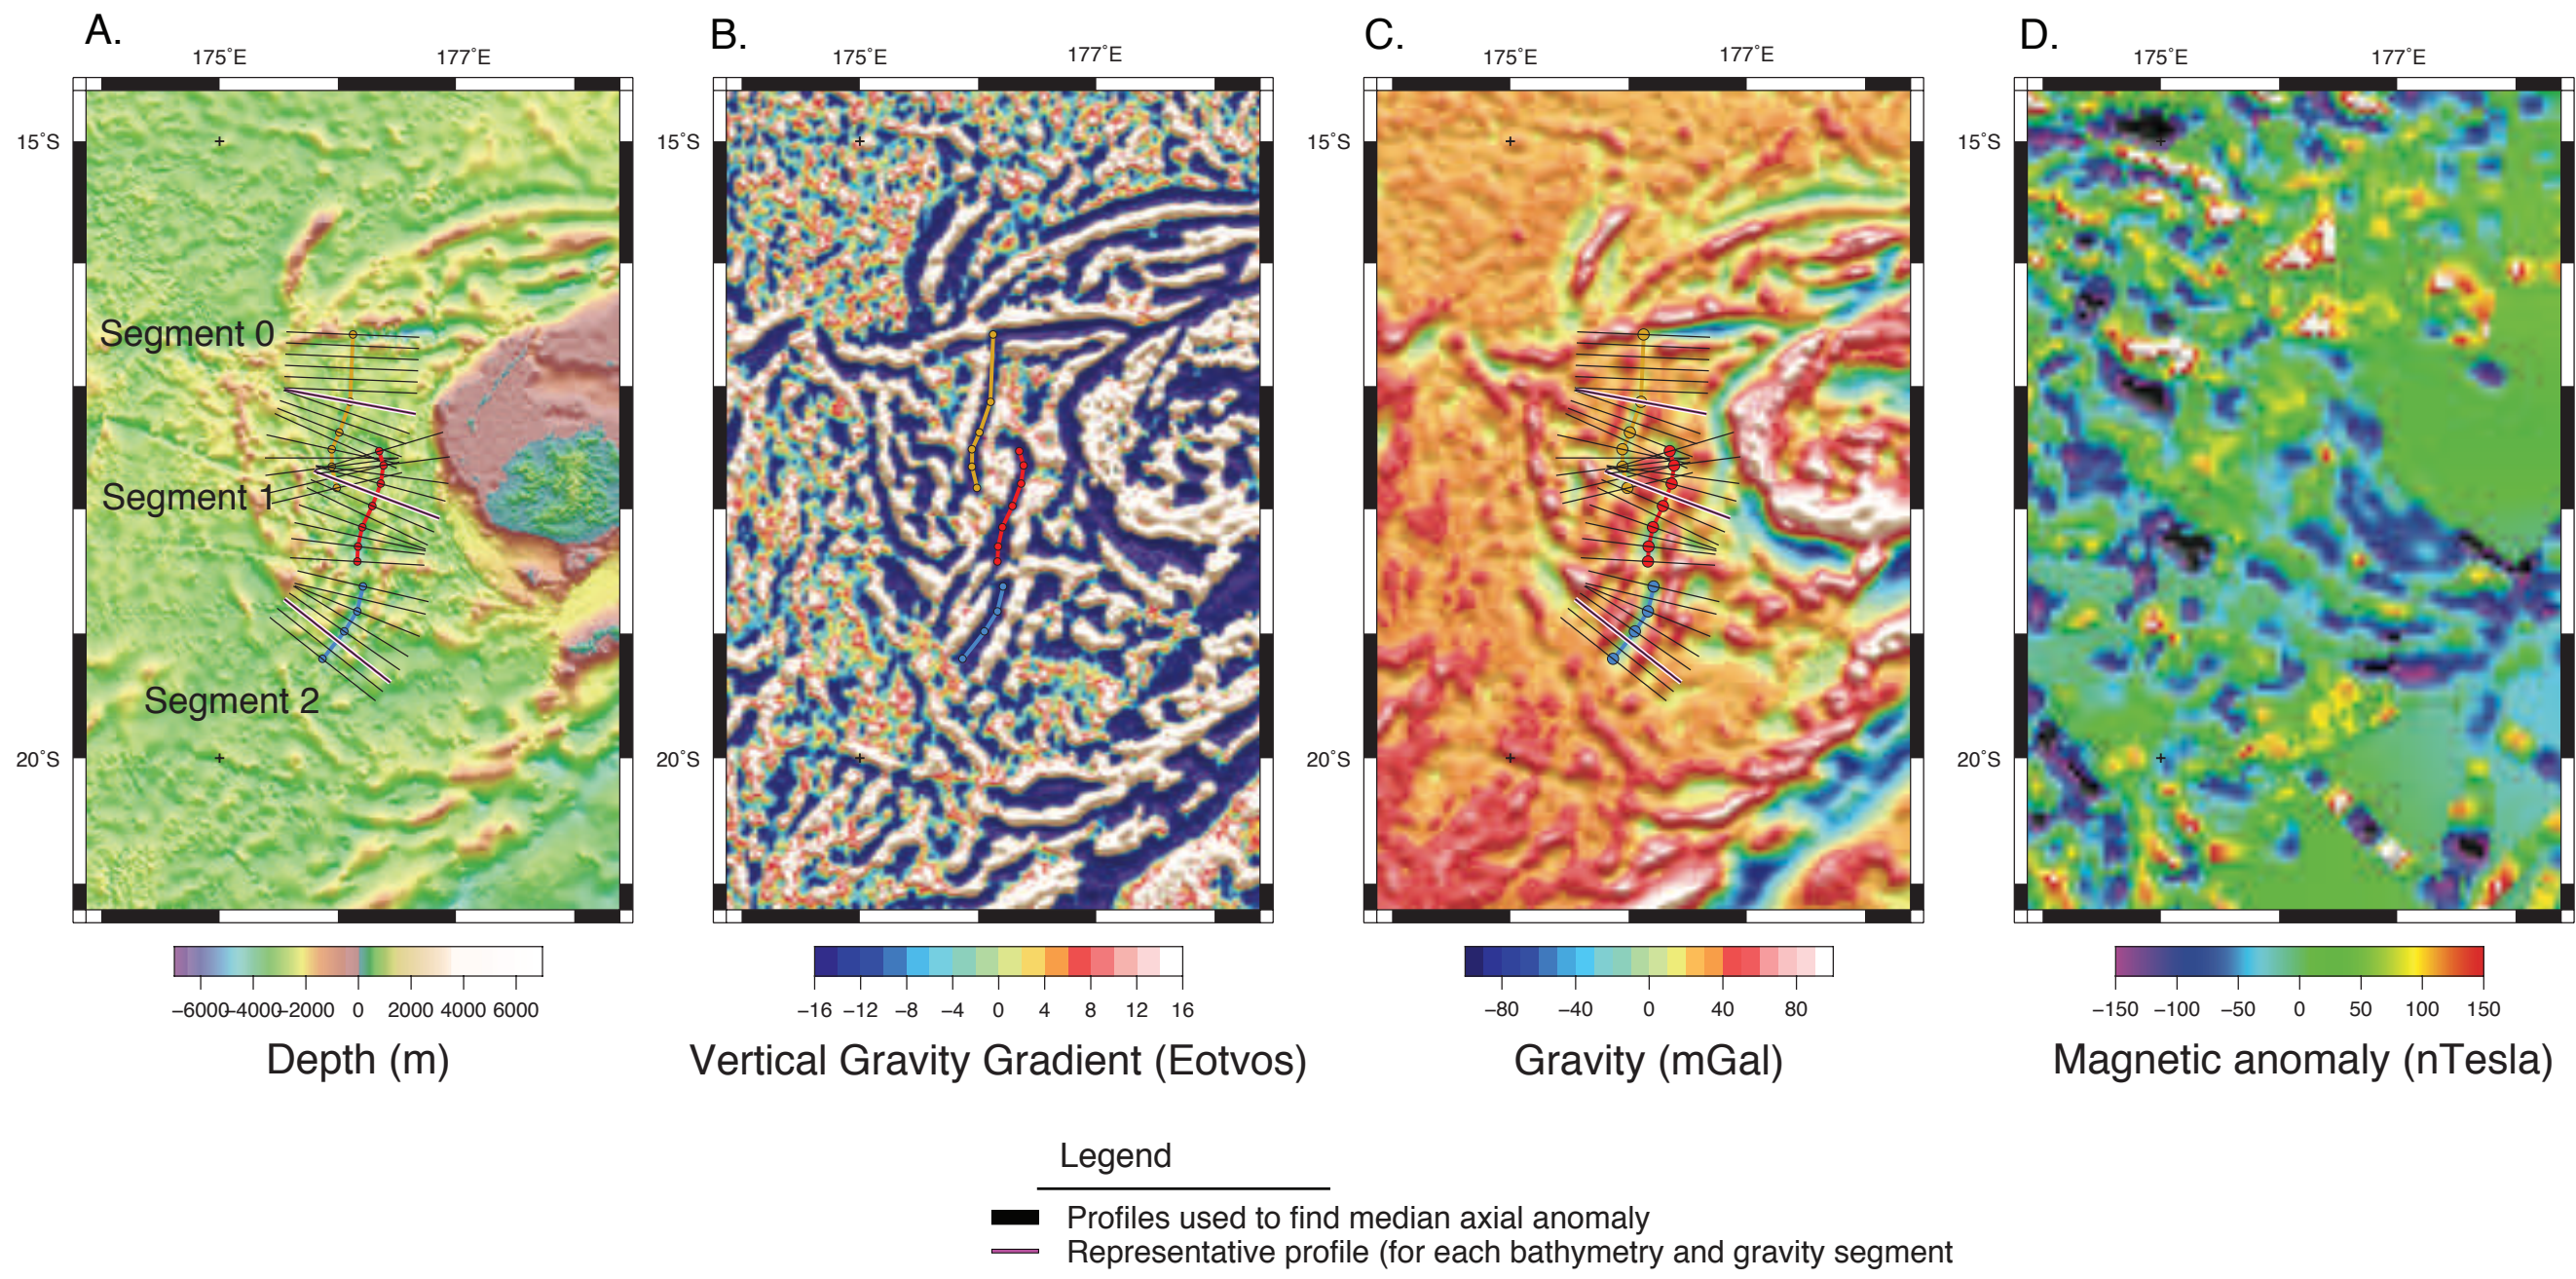

Supplement: Supplementary file 13 [file 22410372]
