# Supplementary material
Source: publisher figshare collection journal article supplement (https://gsapubs.figshare.com/ndownloader/files/22410372)

Supplement 5. Figure AR-10 Mariana Trough spreading ridge - Active back-arc basin spreading ridge.  
Bathymetry, gravity and magnetic anomaly maps of the active spreading segments of the Mariana Trough spreading ridge.

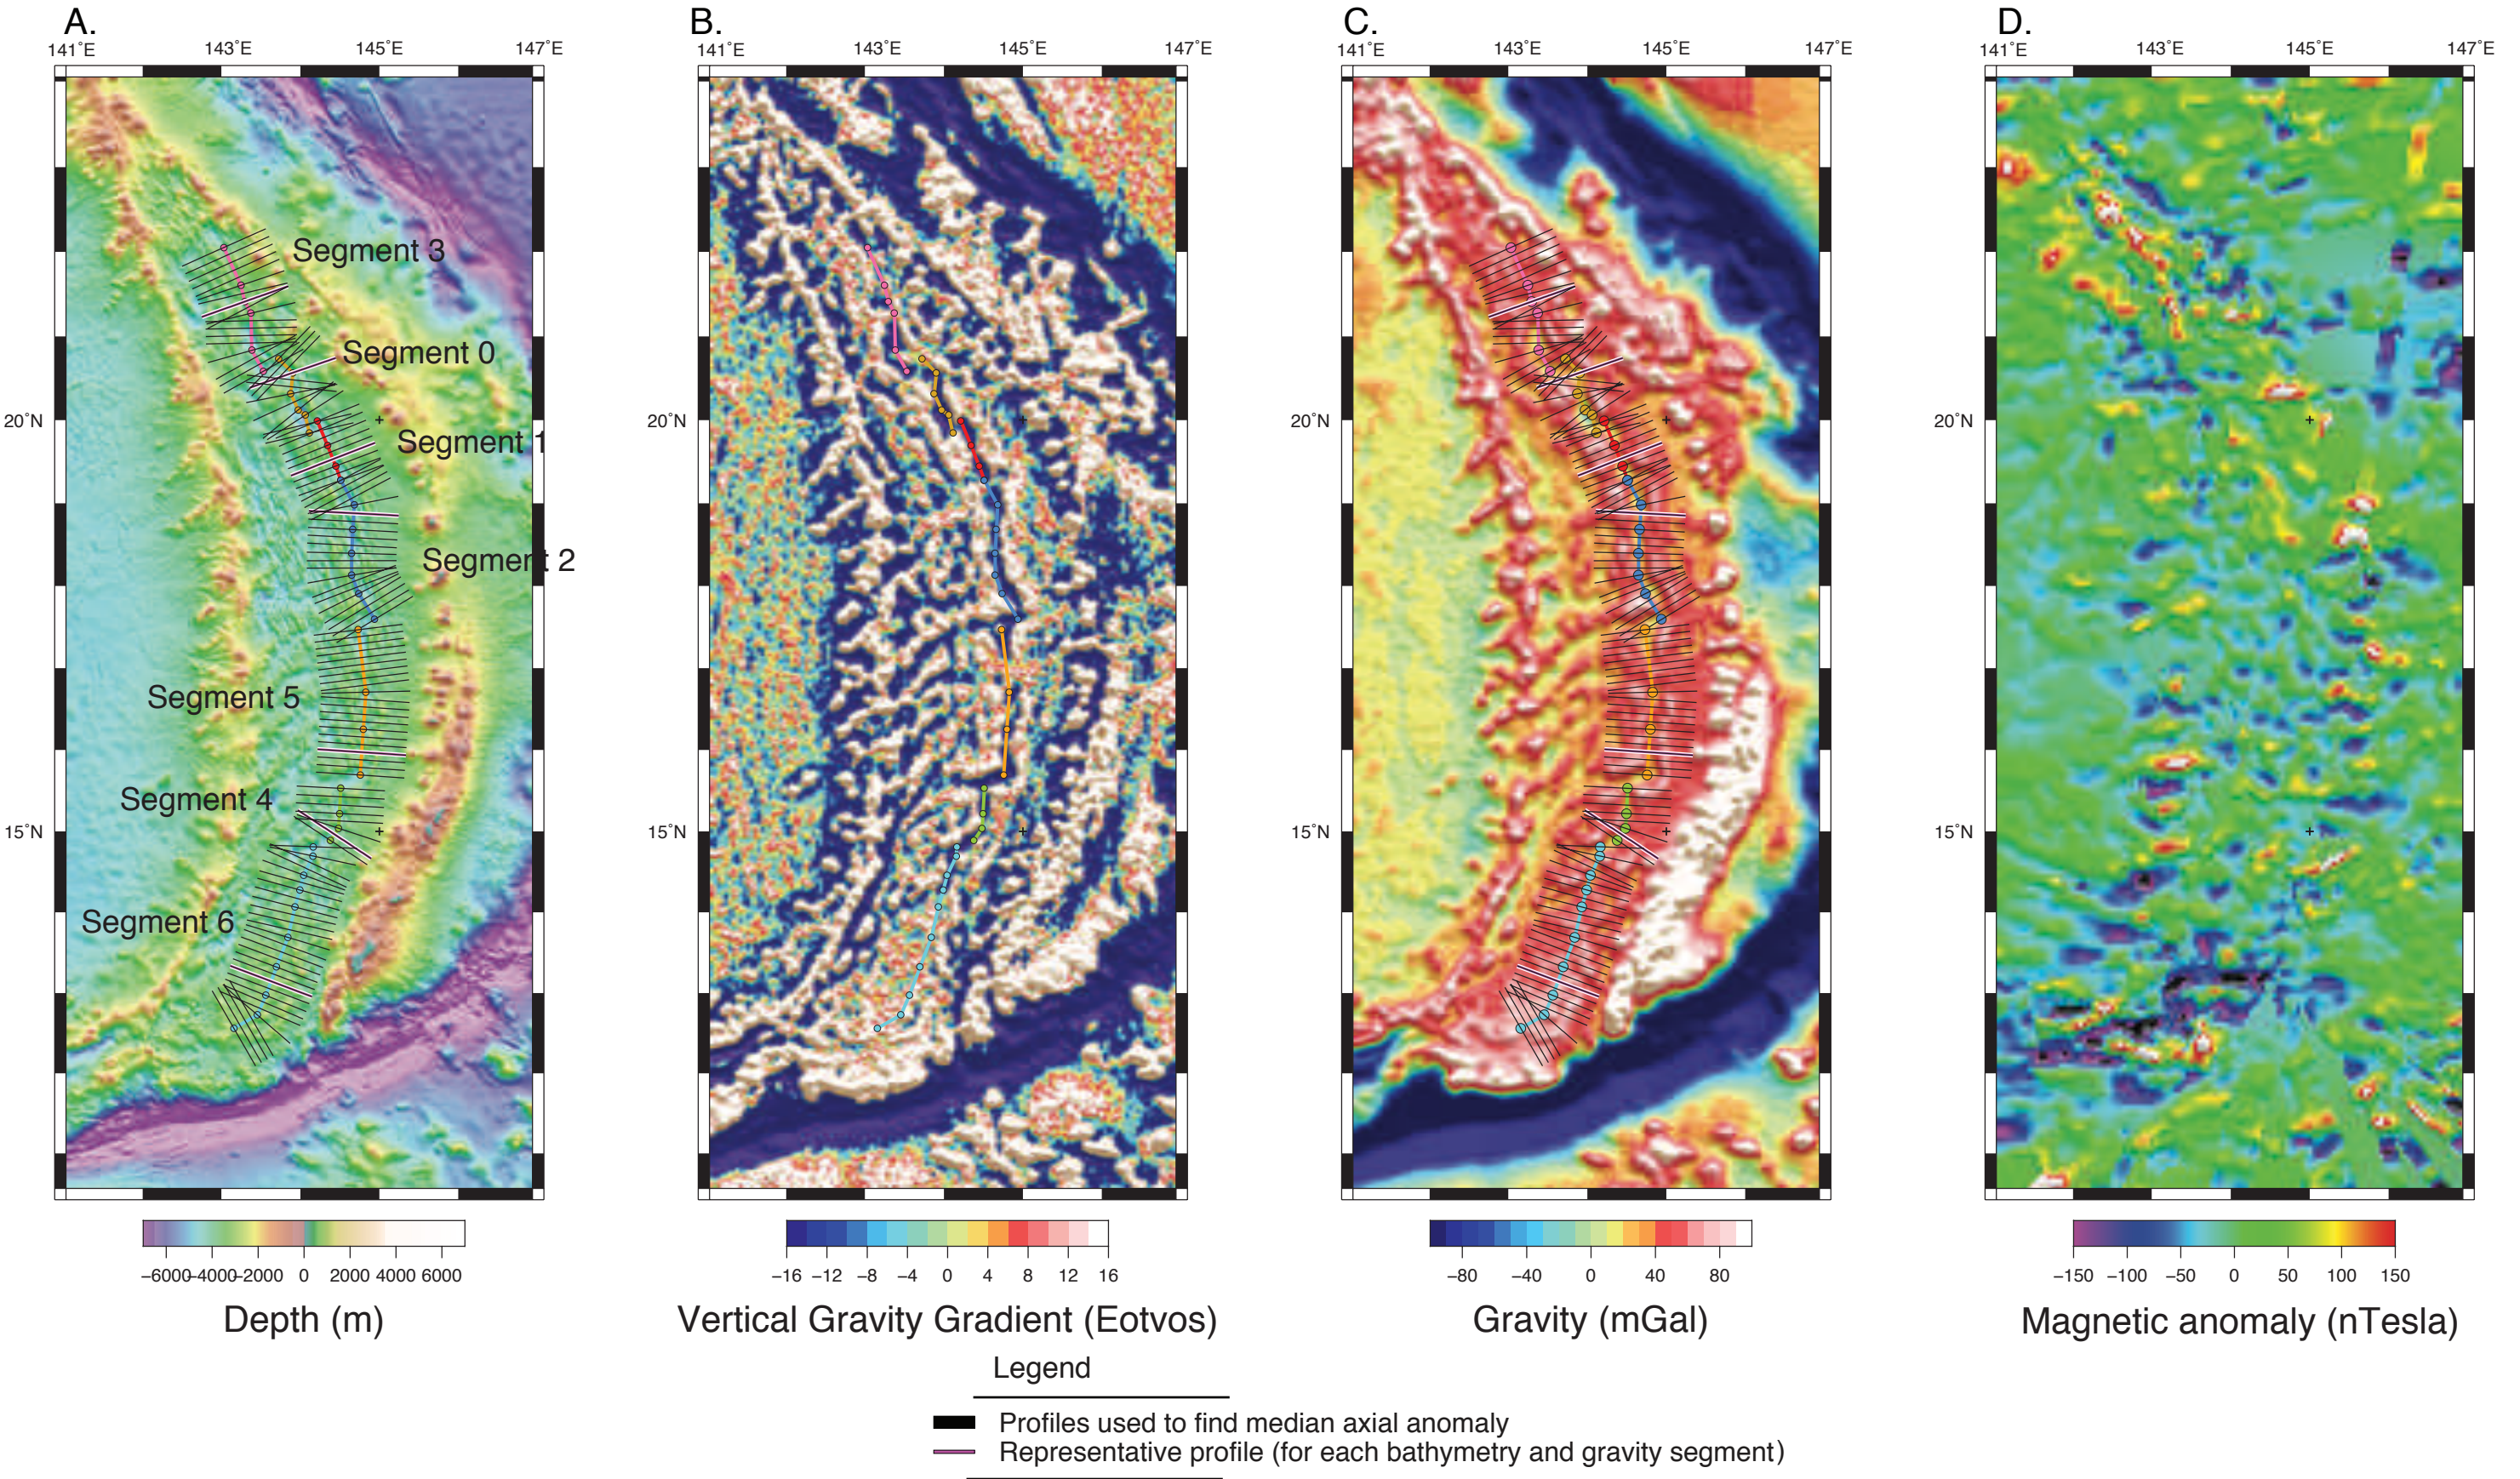

Supplement: Supplementary file 14 [file 22410372]
