# Supplementary material
Source: publisher figshare collection journal article supplement (https://gsapubs.figshare.com/ndownloader/files/22410372)

Supplement 5. Figure AR-1 Southern Mid Atlantic spreading ridge - Active large-scale mid-ocean ridge.  
Bathymetry, gravity and magnetic anomaly maps of the active spreading segments of the southern portion of the Mid-Atlantic Ridge.

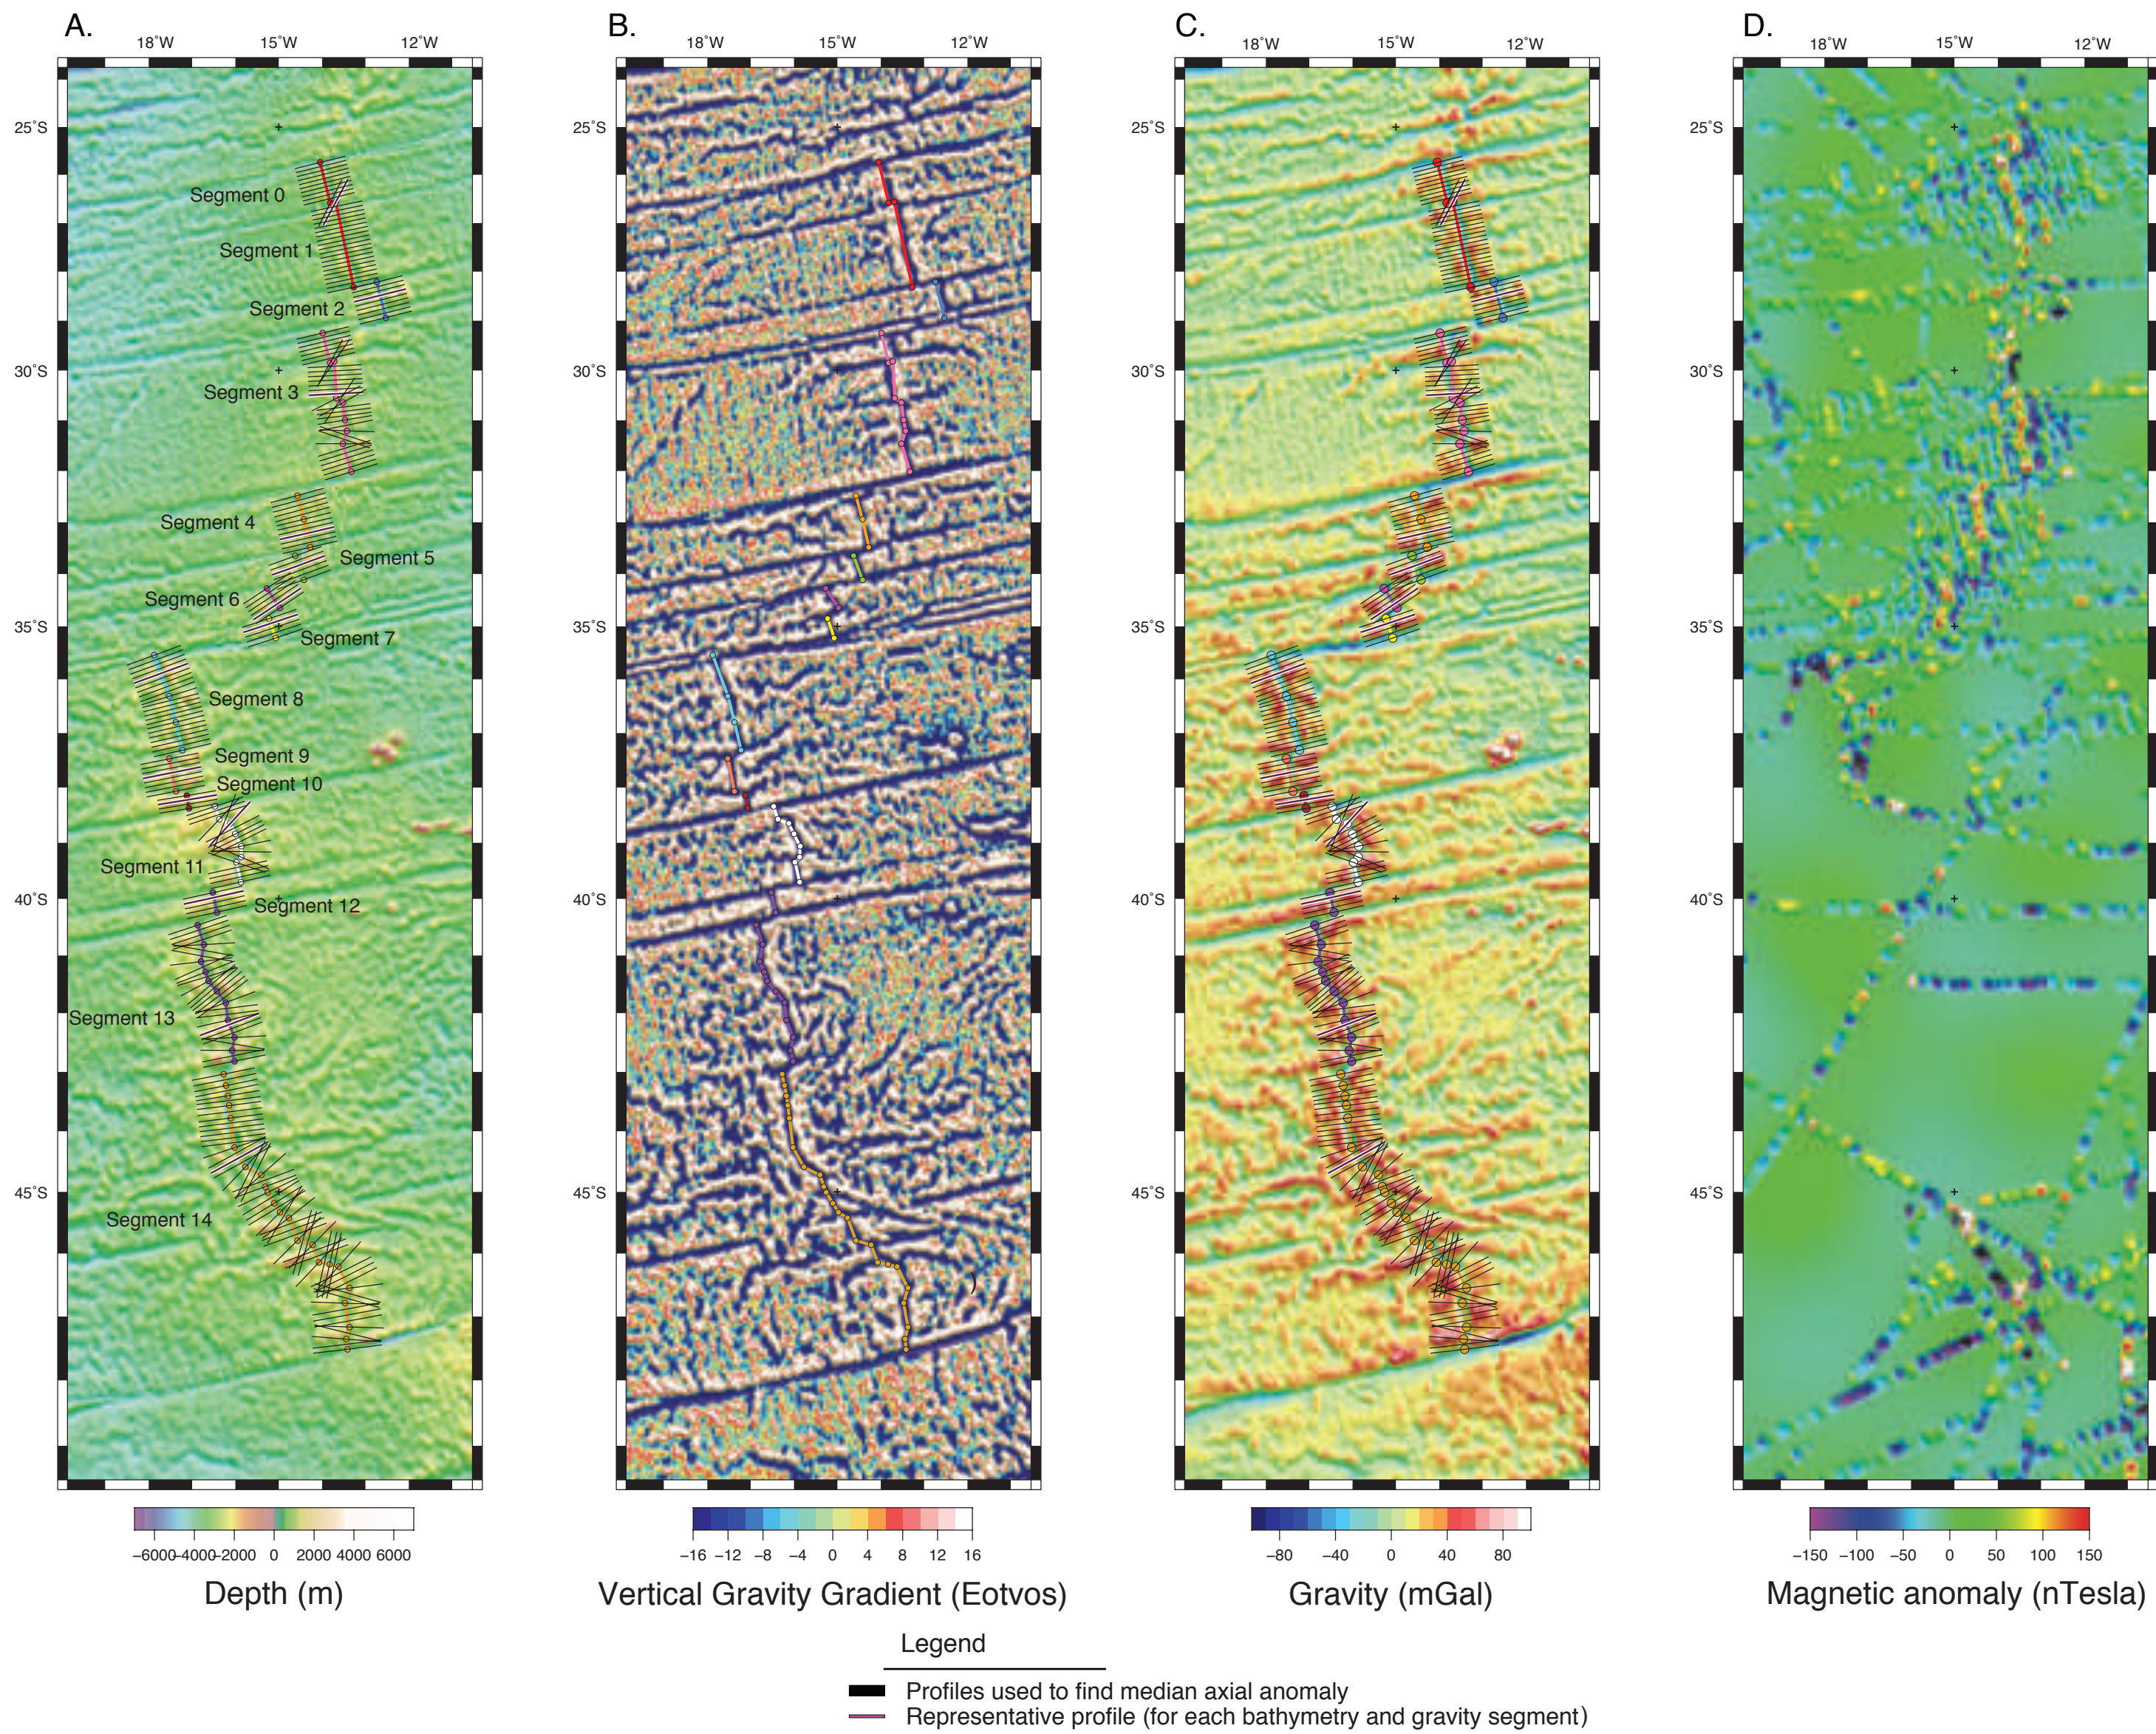

Supplement: Supplementary file 17 [file 22410372]
