# Supplementary material
Source: publisher figshare collection journal article supplement (https://gsapubs.figshare.com/ndownloader/files/22410372)

Supplement 5. Figure AR-5 Northern East Pacific Rise - Active large-scale mid-ocean ridge.

Bathymetry, gravity and magnetic anomaly maps of the active spreading segments of the northern East Pacific Rise.

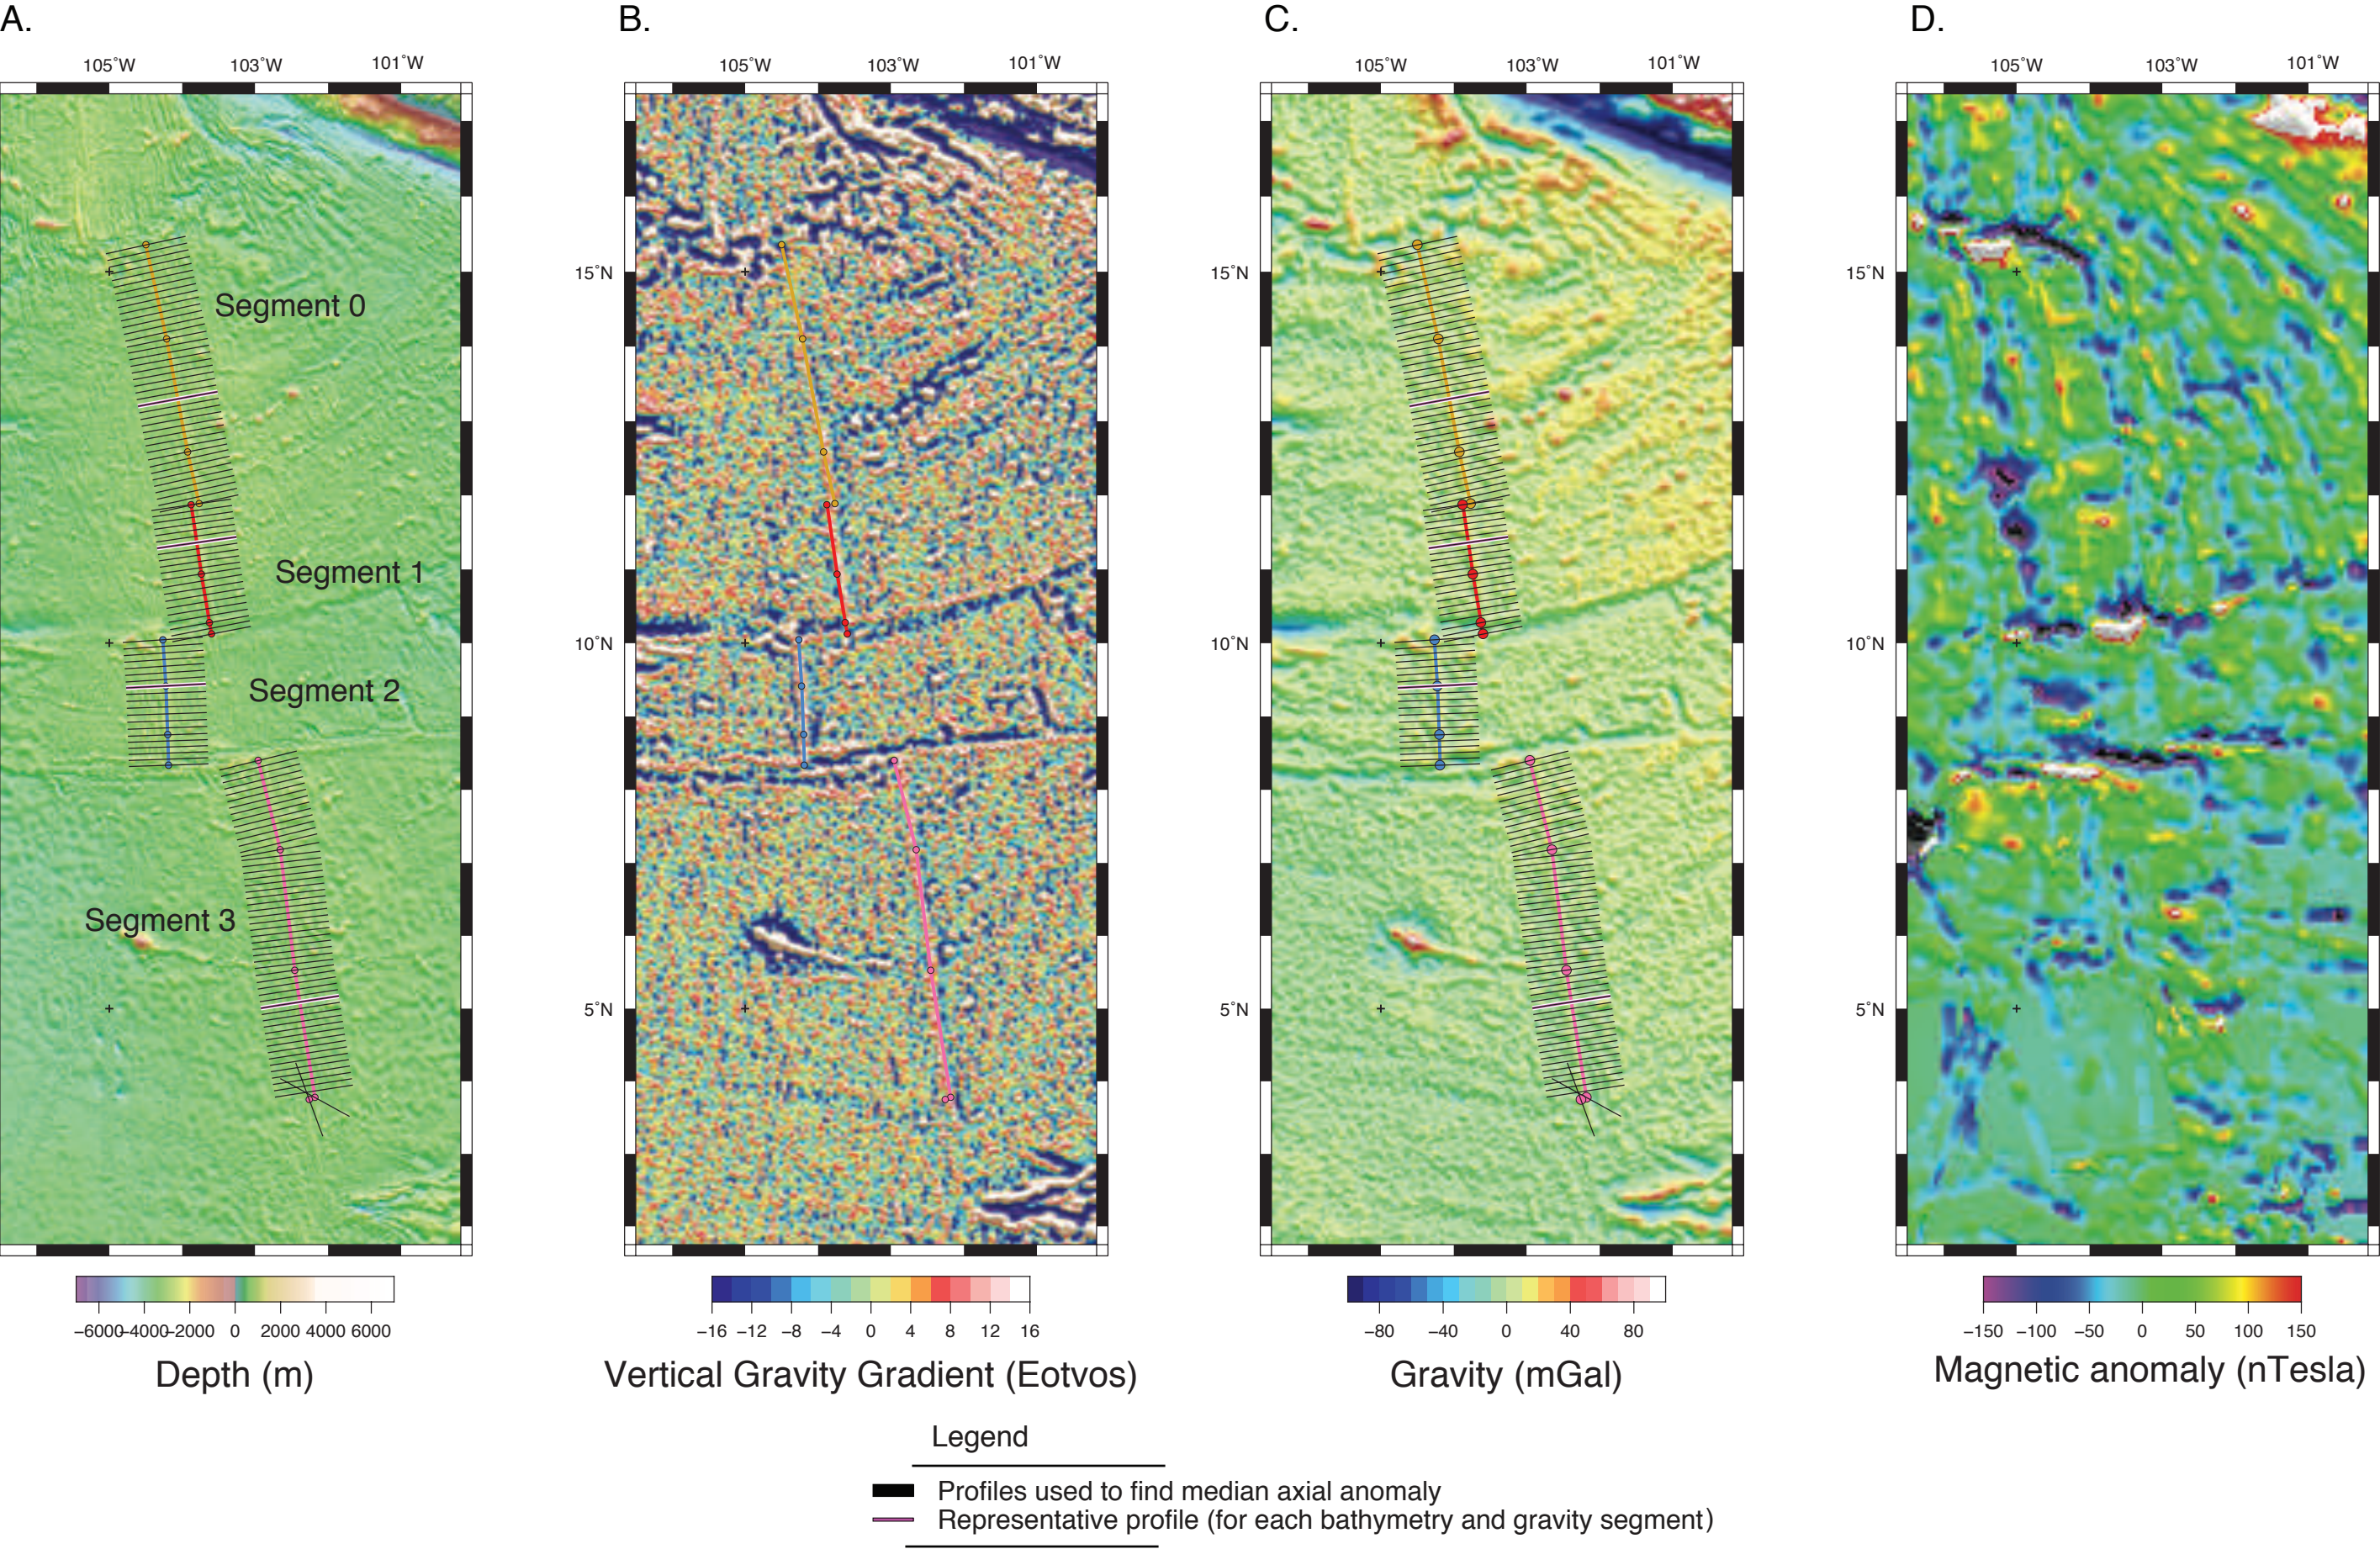

Supplement: Supplementary file 19 [file 22410372]
