# Supplementary material
Source: publisher figshare collection journal article supplement (https://gsapubs.figshare.com/ndownloader/files/22410372)

Supplement 5. Figure AR-14 South Sandwich Ridge - Active back-arc basin spreading ridge.

Bathymetry, gravity and magnetic anomaly maps of the active spreading segments of the South Sandwich Ridge in the Eastern Scotia Sea.

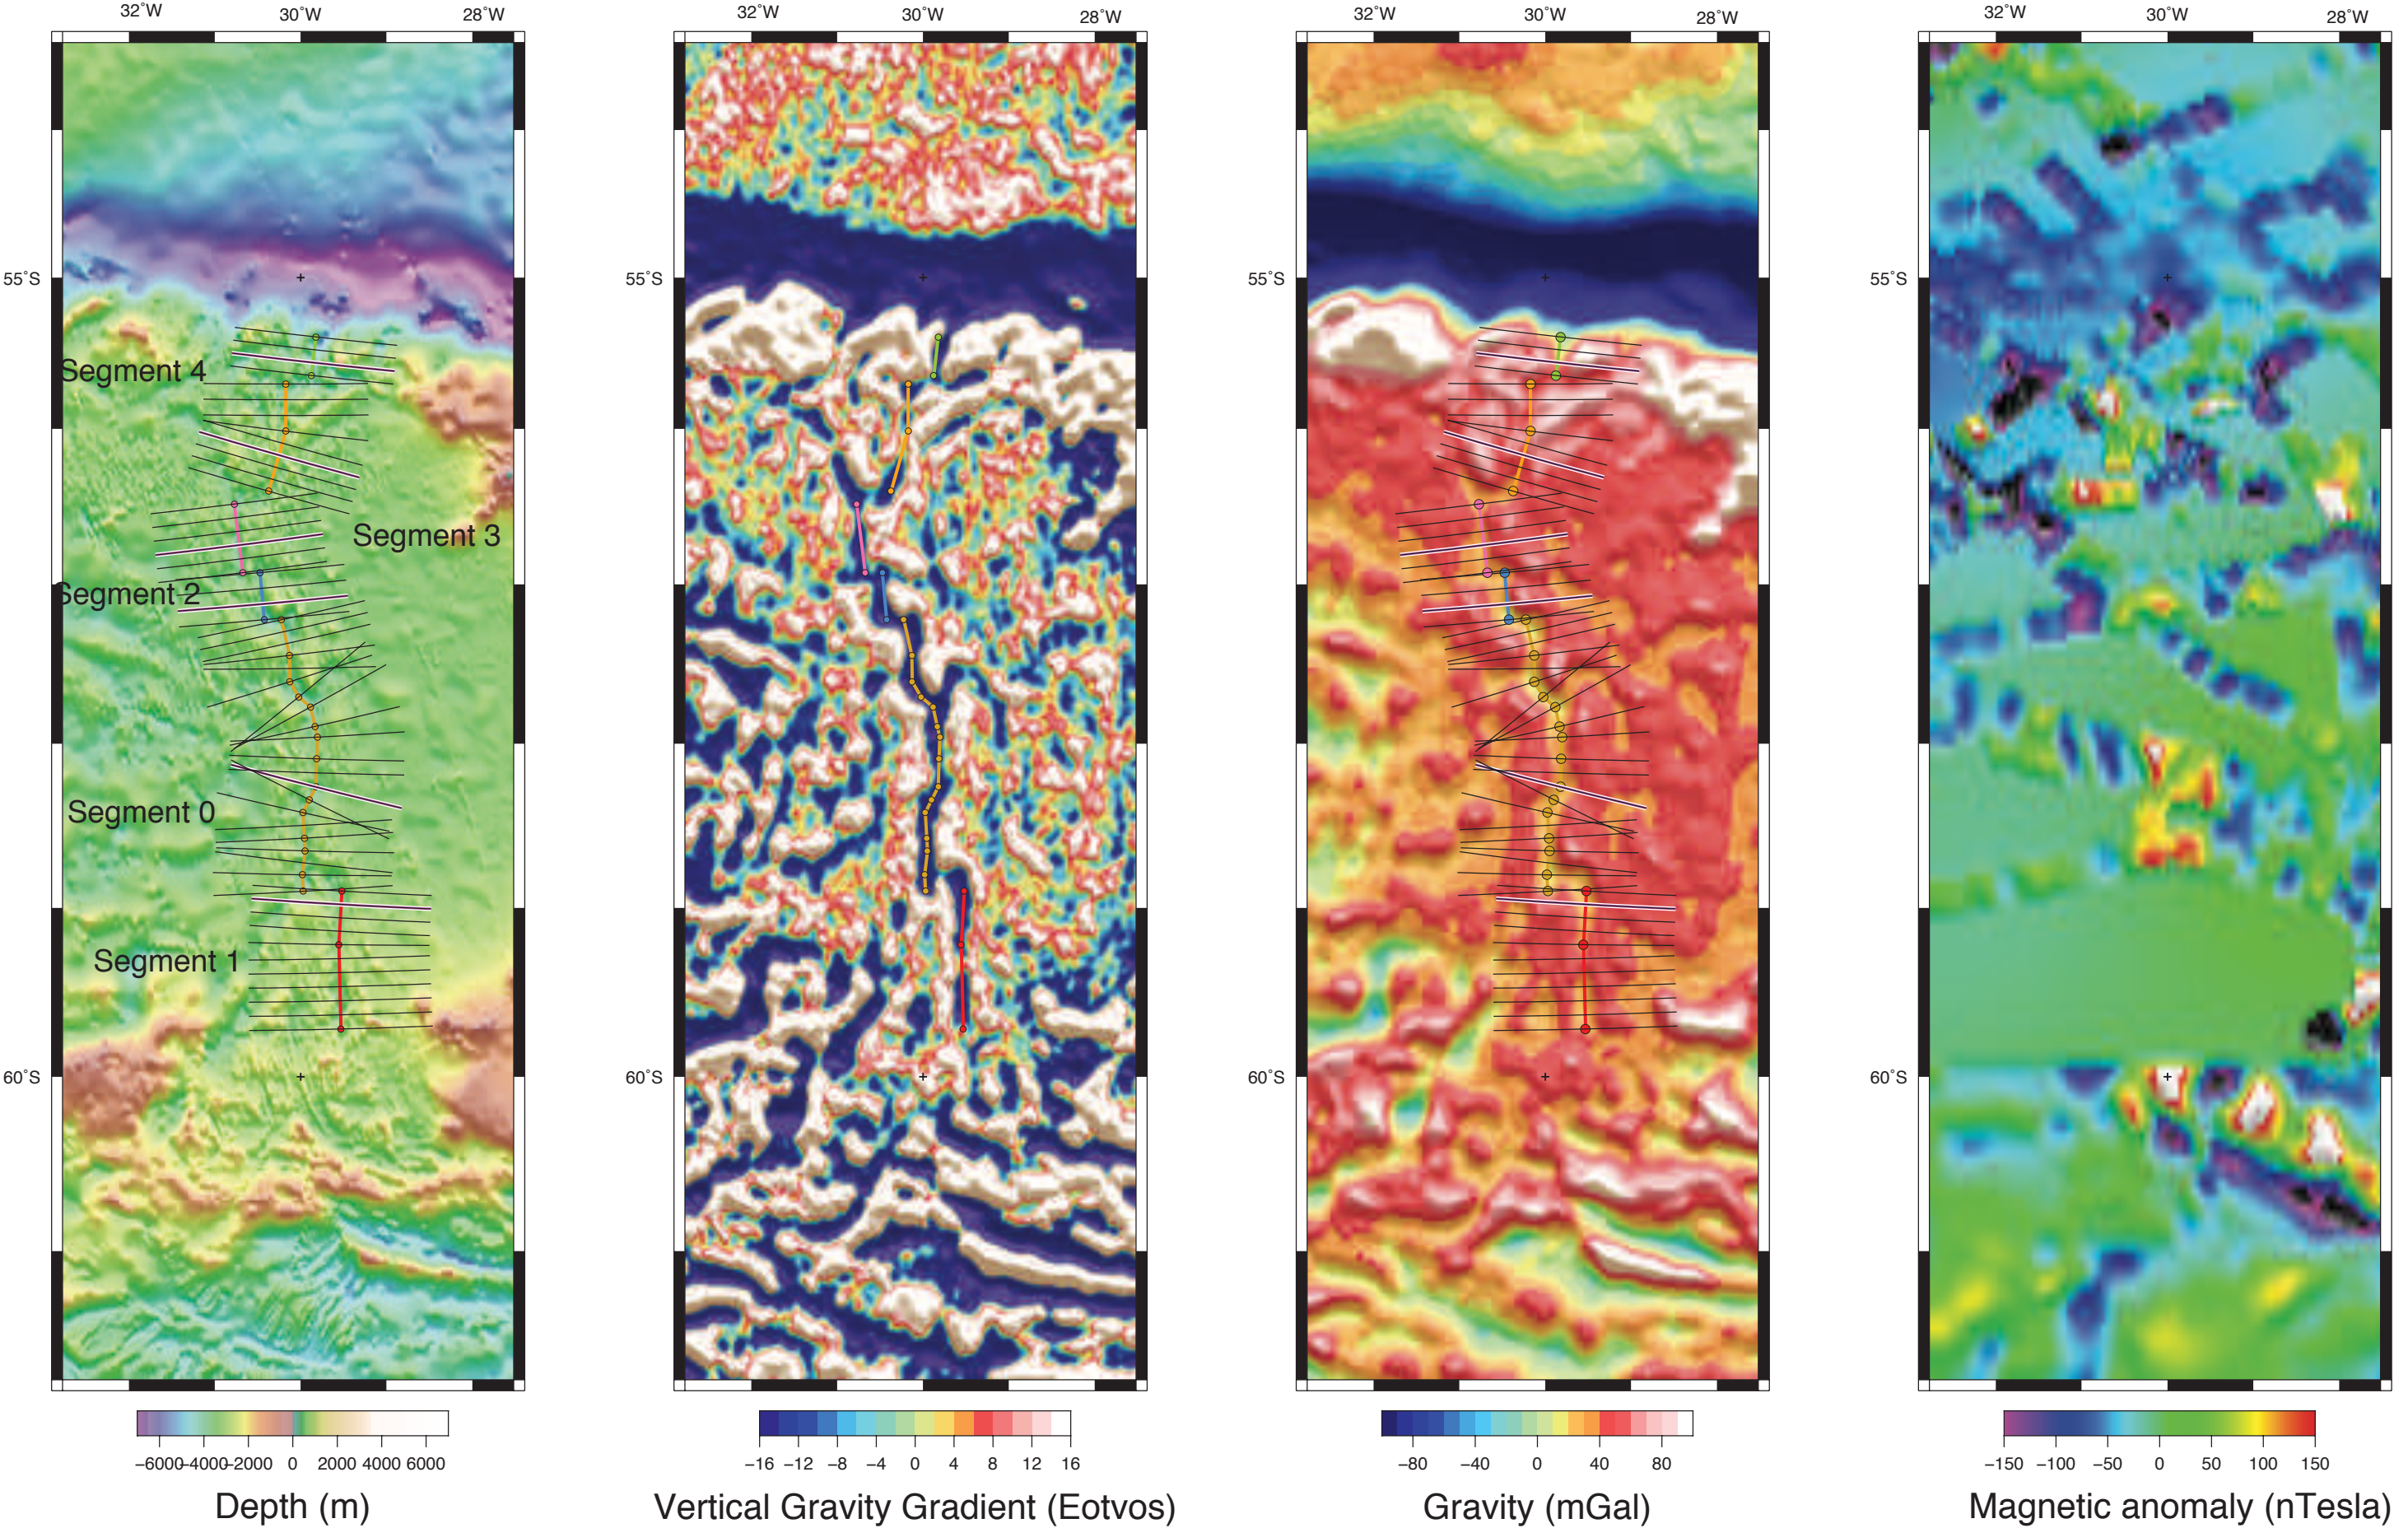

Supplement: Supplementary file 20 [file 22410372]
