# Supplementary material
Source: publisher figshare collection journal article supplement (https://gsapubs.figshare.com/ndownloader/files/22410372)

Supplement 5. Figure AR-4 Pacific-Antarctic large-scale mid-ocean ridge.

Bathymetry, gravity and magnetic anomaly maps of the active spreading segments of the Pacific-Antarctic spreading ridge.

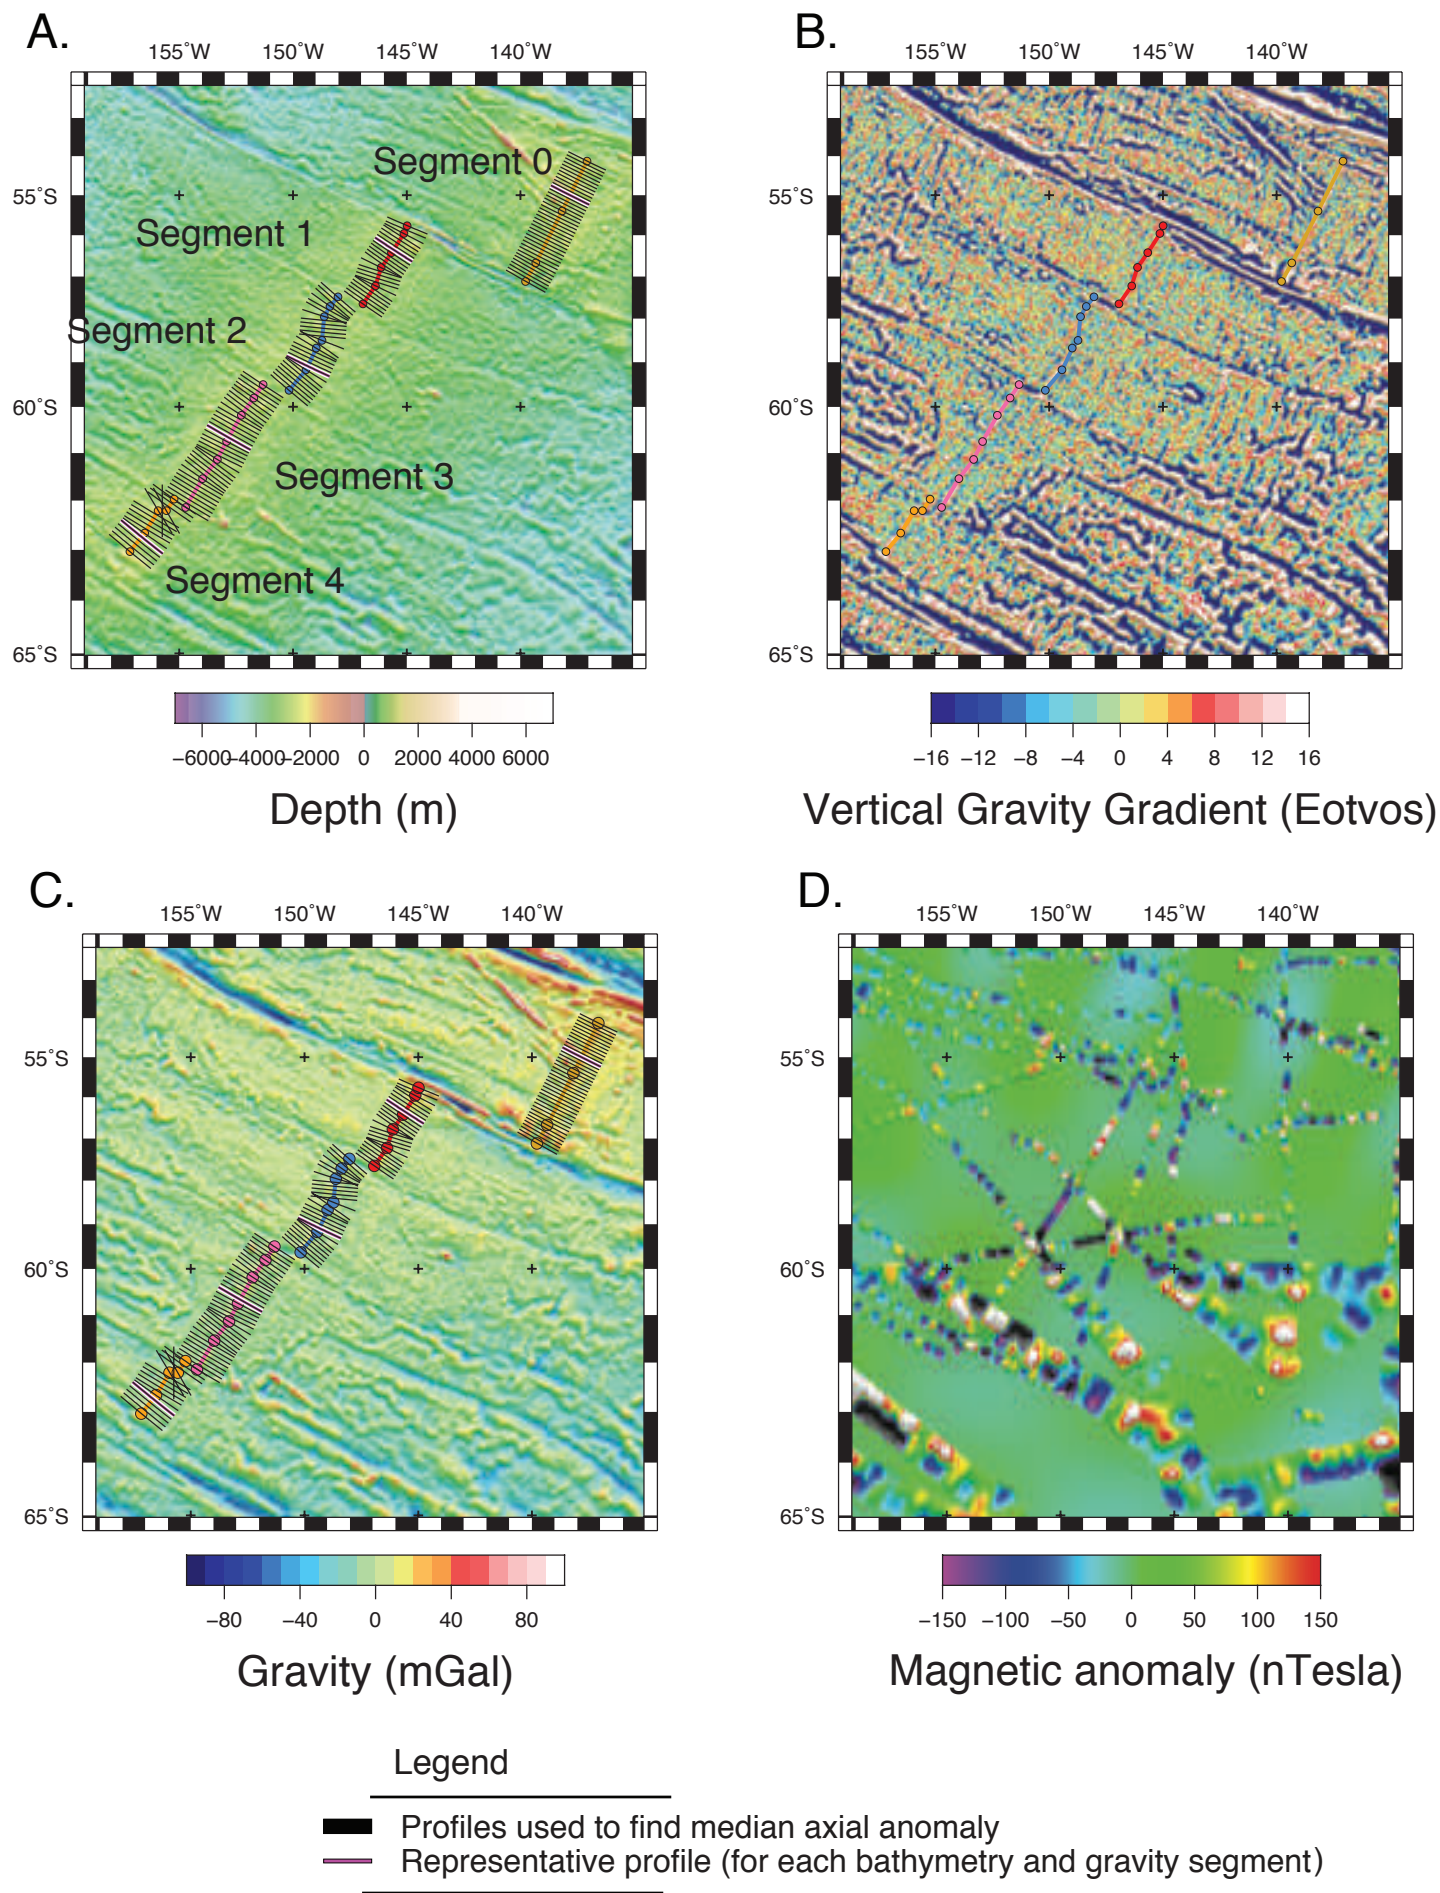

Supplement: Supplementary file 21 [file 22410372]
