# Supplementary material
Source: publisher figshare collection journal article supplement (https://gsapubs.figshare.com/ndownloader/files/22410372)

# Supplement 5. Figure AR-7 Rivera - Microplate spreading ridges.

Bathymetry, gravity and magnetic anomaly maps of the active spreading segments of the Rivera fragmented plate spreading ridge.

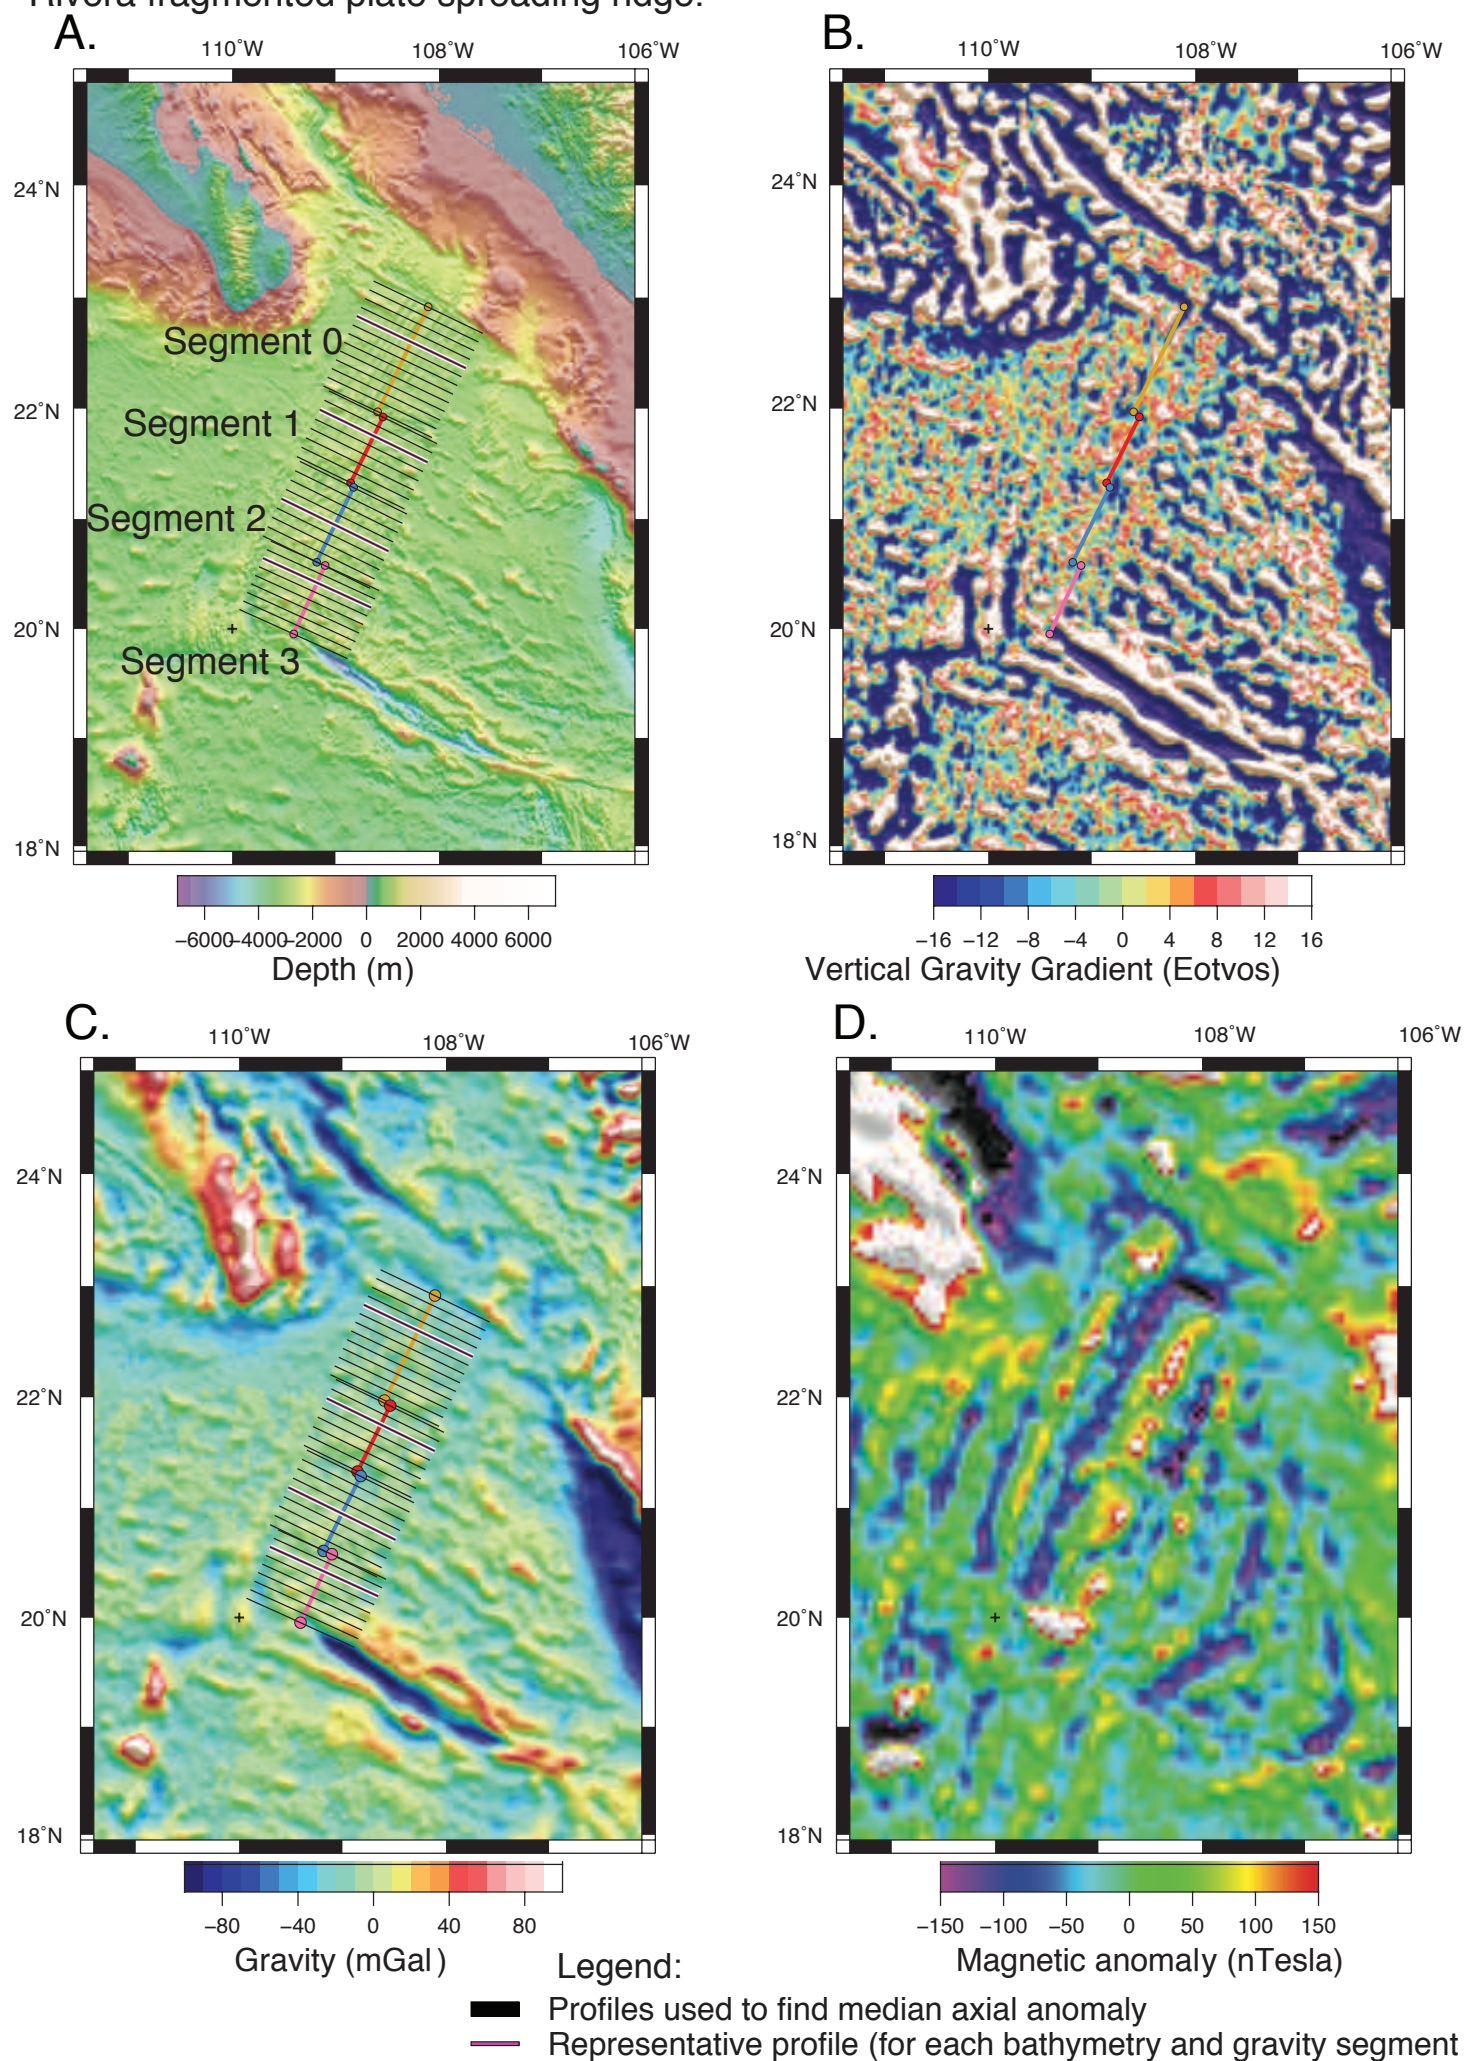

Supplement: Supplementary file 25 [file 22410372]
